# Supplementary material
Source: PubMed Central journal article supplement (PMC3811289)
Supplement: AAC.00738-13_zac011132293so1.pdf [file AAC.00738-13_zac011132293so1.pdf]

|       | Protein         | Strain                  | Species                    | Acc. No.         | Position          | Signature         |
|-------|-----------------|-------------------------|----------------------------|------------------|-------------------|-------------------|
| A     | CcrA1           | NCTC10442               | <i>S. aureus</i>           | BAA86648         | 7-15:             | <b>YLRQST</b> tkQ |
|       | CcrA1           | STU33                   | <i>S. saprophyticus</i>    | BAG24390         | 7-15:             | <b>YLRQST</b> lkQ |
|       | CcrA1           | JCSC6943                | <i>S. aureus</i>           | BAK53058         | 7-15:             | <b>YLRQST</b> tkQ |
|       | CcrA1           | JCSC6945                | <i>S. aureus</i>           | BAK53158         | 7-15:             | <b>YLRQST</b> tkQ |
|       | CcrA1           | LGA251                  | <i>S. aureus</i>           | CCC86806         | 7-15:             | <b>YLRQST</b> lkQ |
|       | CcrA2           | N315                    | <i>S. aureus</i>           | BAA82194         | 7-15:             | <b>YLRQST</b> mkQ |
|       | CcrA2           | MW2                     | <i>S. aureus</i>           | NP_644854        | 7-15:             | <b>YLRQST</b> mkQ |
|       | CcrA2           | SE50                    | <i>S. epidermidis</i>      | ABF59120         | 7-15:             | <b>YLRQST</b> mkQ |
|       | CcrA3           | 85/2082                 | <i>S. aureus</i>           | BAA88754         | 7-15:             | <b>YLRQST</b> tkQ |
|       | CcrA3           | KM1381                  | <i>S. pseudintermedius</i> | CAP17736         | 7-15:             | <b>YLRQST</b> tkQ |
|       | CcrA4           | HDE288                  | <i>S. aureus</i>           | AAL85204         | 7-15:             | <b>YVRQST</b> lkQ |
|       | CcrA4           | CHE482(4-1)             | <i>S. aureus</i>           | ABL75417         | 7-15:             | <b>YVRQST</b> lkQ |
|       | CcrA4           | CHE482(4-2)             | <i>S. aureus</i>           | ABL75419         | 7-15:             | <b>YVRQST</b> lkQ |
|       | CcrA4           | ATCC 12228              | <i>S. epidermidis</i>      | NP_763612        | 7-15:             | <b>YVRQST</b> lkQ |
|       | CcrA5           | KM241                   | <i>S. pseudintermedius</i> | CAP17701         | 7-15:             | <b>YLRQST</b> tkQ |
|       | CcrB1           | GIFU12263               | <i>S. hominis</i>          | BAB83487         | 12-20:            | <b>YTRVST</b> erQ |
|       | CcrB1           | MSSA476                 | <i>S. aureus</i>           | YP_042165        | 12-20:            | <b>YTRVST</b> erQ |
|       | CcrB1           | JCSC6943                | <i>S. aureus</i>           | BAK53057         | 12-20:            | <b>YTRVST</b> ekQ |
|       | CcrB2           | N315                    | <i>S. aureus</i>           | BAA82196         | 12-20:            | <b>YVRVST</b> emQ |
|       | CcrB2           | CA05                    | <i>S. aureus</i>           | BAB72109         | 12-20:            | <b>YVRVST</b> emQ |
|       | CcrB2           | ATCC12228               | <i>S. epidermidis</i>      | NP_763591        | 12-20:            | <b>YVRVST</b> emQ |
|       | CcrB2           | DM35                    | <i>S. warneri</i>          | ABB52797         | 12-20:            | <b>YVRVST</b> emQ |
|       | CcrB3           | LAG251                  | <i>S. aureus</i>           | CCC86805         | 12-20:            | <b>YVRVST</b> emQ |
|       | CcrB3           | KM241                   | <i>S. pseudintermedius</i> | CAP17702         | 12-20:            | <b>YVRVST</b> emQ |
|       | CcrB3           | KM1381                  | <i>S. pseudintermedius</i> | CAP17737         | 12-20:            | <b>YVRVST</b> eiQ |
|       | CcrB3           | RP62A                   | <i>S. epidermidis</i>      | YP_190041        | 12-20:            | <b>YVRVST</b> emQ |
|       | CcrB3           | TSU33                   | <i>S. saprophyticus</i>    | BAG24389         | 12-20:            | <b>YVRVST</b> eiQ |
|       | CcrB4           | HDE288                  | <i>S. aureus</i>           | AAL85205         | 12-20:            | <b>YARVST</b> emQ |
|       | CcrB4           | ATCC12228               | <i>S. epidermidis</i>      | NP_763611        | 12-20:            | <b>YARVST</b> emQ |
|       | CcrB4           | M06/0171                | <i>S. aureus</i>           | CCK74160         | 12-20:            | <b>YARVST</b> etQ |
| CcrB6 | JCSC6945        | <i>S. aureus</i>        | BAK53157                   | 12-20:           | <b>YTRVST</b> erQ |                   |
| CcrC  | JCSC6082        | <i>S. aureus</i>        | BAG71445                   | 8-16:            | <b>YSRVST</b> seQ |                   |
| CcrC  | ZH47            | <i>S. aureus</i>        | CAL22883                   | 8-16:            | <b>YSRVST</b> seQ |                   |
| CcrC  | WIS             | <i>S. aureus</i>        | BAD24834                   | 8-16:            | <b>YSRVST</b> seQ |                   |
| CcrC  | TSGH17          | <i>S. aureus</i>        | AAY60816                   | 8-16:            | <b>YSRVST</b> seQ |                   |
| CcrC  | 85/2082         | <i>S. aureus</i>        | BAB47672                   | 8-16:            | <b>YSRVST</b> seQ |                   |
| CcrC  | PM1             | <i>S. aureus</i>        | BAG06191                   | 8-16:            | <b>YSRVST</b> seQ |                   |
| CcrC  | M06/0171        | <i>S. aureus</i>        | CCK74167                   | 8-16:            | <b>YSRVST</b> seQ |                   |
| CcrC  | JCSC1435        | <i>S. haemolyticus</i>  | BAE03365                   | 8-16:            | <b>YSRVST</b> seQ |                   |
| CcrC  | 25-60           | <i>S. haemolyticus</i>  | ABP68832                   | 8-16:            | <b>YSRVST</b> seQ |                   |
| CcrC  | 13-48           | <i>S. epidermidis</i>   | ABP68833                   | 8-16:            | <b>YSRVST</b> seQ |                   |
| CcrC  | ATCC15305       | <i>S. saprophyticus</i> | YP_300136                  | 8-16:            | <b>YSRVST</b> seQ |                   |
| B     | pLG2 resolvase  | 57395                   | <i>S. pseudintermedius</i> | 100% to AEF32572 | 6-14:             | <b>YARVST</b> asQ |
|       | Tn552 resolvase | 57395                   | <i>S. pseudintermedius</i> | 100% to ADX77603 | 5-13:             | <b>YARVST</b> glQ |

FIG. S1. A. Alignment of the site-specific recombinase motif of selected representatives of the Ccr serine recombinase family. The motif is defined as: Y-[LIVACST]-R-[VAQ]-S-[ST]-x(2)-Q, with the catalytic serine residue indicated in bold, amino acids (aa) acceptable for one given position listed between square brackets and x for any aa followed by the possible repetition range between the parentheses. This pattern is a modified version of the Prosite entry PS00397. Invariant aa are shaded black, highly conserved aa dark grey, and less conserved positions light grey. B. Two positive hits were obtained in the sequence of MRSP 57395 with this site-specific recombinase motif. Both showed site-specific recombinases with a serine in the active site, but were unrelated with mobilization of SCCmec.
